# Supplementary material
Source: PubMed Central journal article supplement (PMC6264643)
Supplement: jci-128-121366-s148.pdf [file jci-128-121366-s148.pdf]

Figure S1

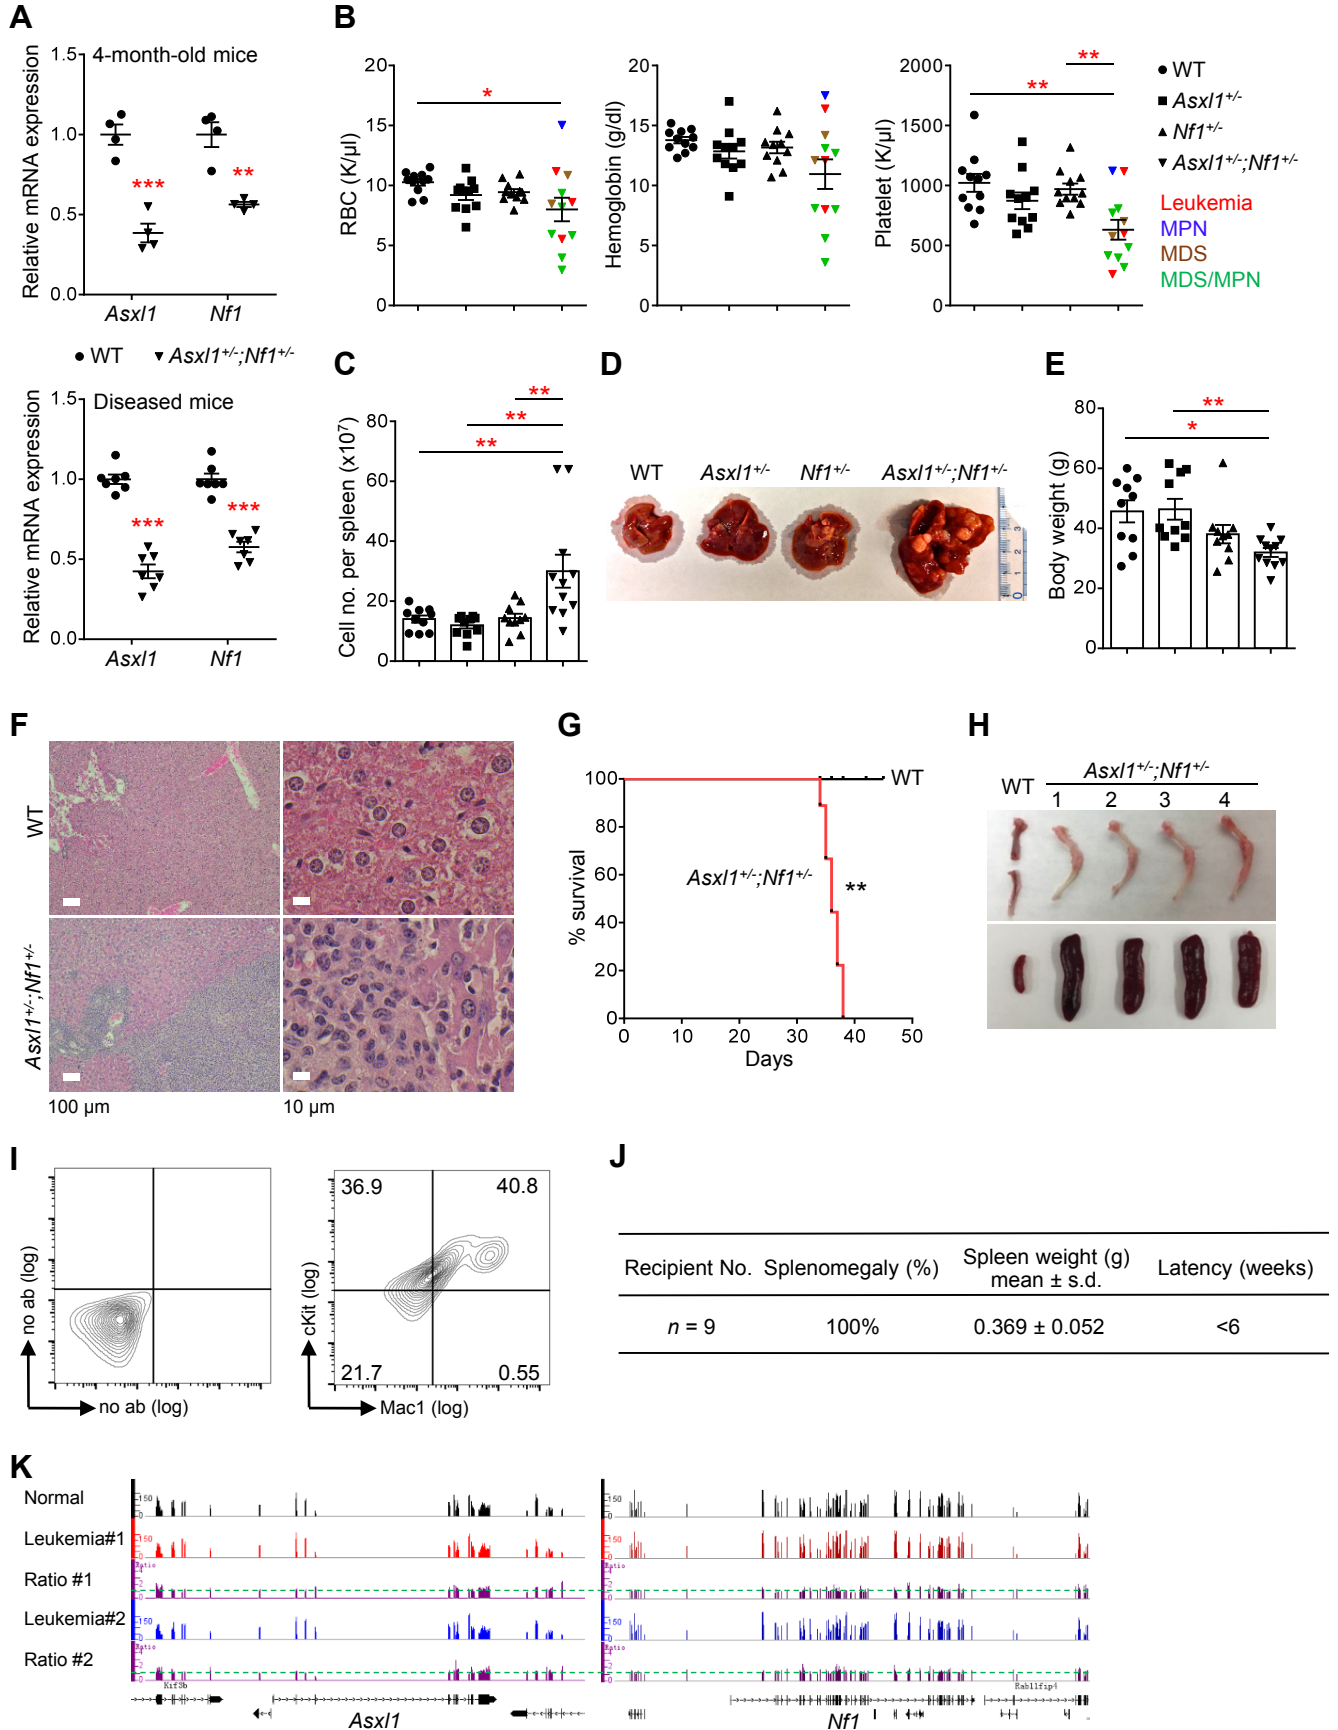

**Figure S1. Development of myeloid leukemia in *Asx1<sup>+/-</sup>;Nf1<sup>+/-</sup>* mice.** (A) qPCR results showing the mRNA levels of *Asx1* and *Nf1* in WT and *Asx1<sup>+/-</sup>;Nf1<sup>+/-</sup>* mice. Top, BM cKit<sup>+</sup> cells from 4-month-old *Asx1<sup>+/-</sup>;Nf1<sup>+/-</sup>* mice ( $n = 4$  per group); bottom, spleen cells from diseased *Asx1<sup>+/-</sup>;Nf1<sup>+/-</sup>* mice ( $n = 7$  per group, two with myeloid leukemia and five with MDS/MPN in *Asx1<sup>+/-</sup>;Nf1<sup>+/-</sup>* mice). (B) Parameters of PB were summarized from WT, *Asx1<sup>+/-</sup>*, *Nf1<sup>+/-</sup>*, and *Asx1<sup>+/-</sup>;Nf1<sup>+/-</sup>* mice at the time of sacrifice ( $n = 11$  to 12 per group). (C) Spleen cellularity ( $n = 10$  to 11 mice per group). (D) The gross morphologies of the liver from each genotype of mice. Tumors infiltrating liver in *Asx1<sup>+/-</sup>;Nf1<sup>+/-</sup>* mice. (E) Body weight of WT, *Asx1<sup>+/-</sup>*, *Nf1<sup>+/-</sup>* and *Asx1<sup>+/-</sup>;Nf1<sup>+/-</sup>* mice at the time of sacrifice ( $n = 10$  to 11 per group). (F) Representative H&E stained sections from the liver of WT and *Asx1<sup>+/-</sup>;Nf1<sup>+/-</sup>* mice are shown. Scale bar: left, 100  $\mu\text{m}$ ; right, 10  $\mu\text{m}$ . (G) Kaplan-Meier survival curve of secondary recipient mice transplanted with *Asx1<sup>+/-</sup>;Nf1<sup>+/-</sup>* spleen cells (WT,  $n = 5$  and *Asx1<sup>+/-</sup>;Nf1<sup>+/-</sup>*  $n = 9$ ). A log-rank test was used for survival statistics. (H) Representative photographs of bone and spleen from secondary recipient mice transplanted with *Asx1<sup>+/-</sup>;Nf1<sup>+/-</sup>* spleen cells at 6-week after transplantation. (I) Flow cytometric analysis of BM cells revealed that the recipients had the similar Mac1<sup>+</sup>/cKit<sup>+</sup> population with the primary mouse. (J) Enlargement of spleens from secondary recipient mice transplanted with *Asx1<sup>+/-</sup>;Nf1<sup>+/-</sup>* spleen cells at 6-week after transplantation. (K) *Asx1* and *Nf1* gene coverages and read depth ratios obtained through whole exome sequencing of *Asx1<sup>+/-</sup>;Nf1<sup>+/-</sup>* leukemia cells ( $n = 2$ ) and matched normal tissue. Data represent mean  $\pm$  SEM. \* $P < 0.05$ ; \*\* $P < 0.01$ ; \*\*\* $P < 0.001$ ; unpaired Student's  $t$ -test (A) or one-way ANOVA with Tukey's multiple comparisons test (B-C, and E).

Figure S2

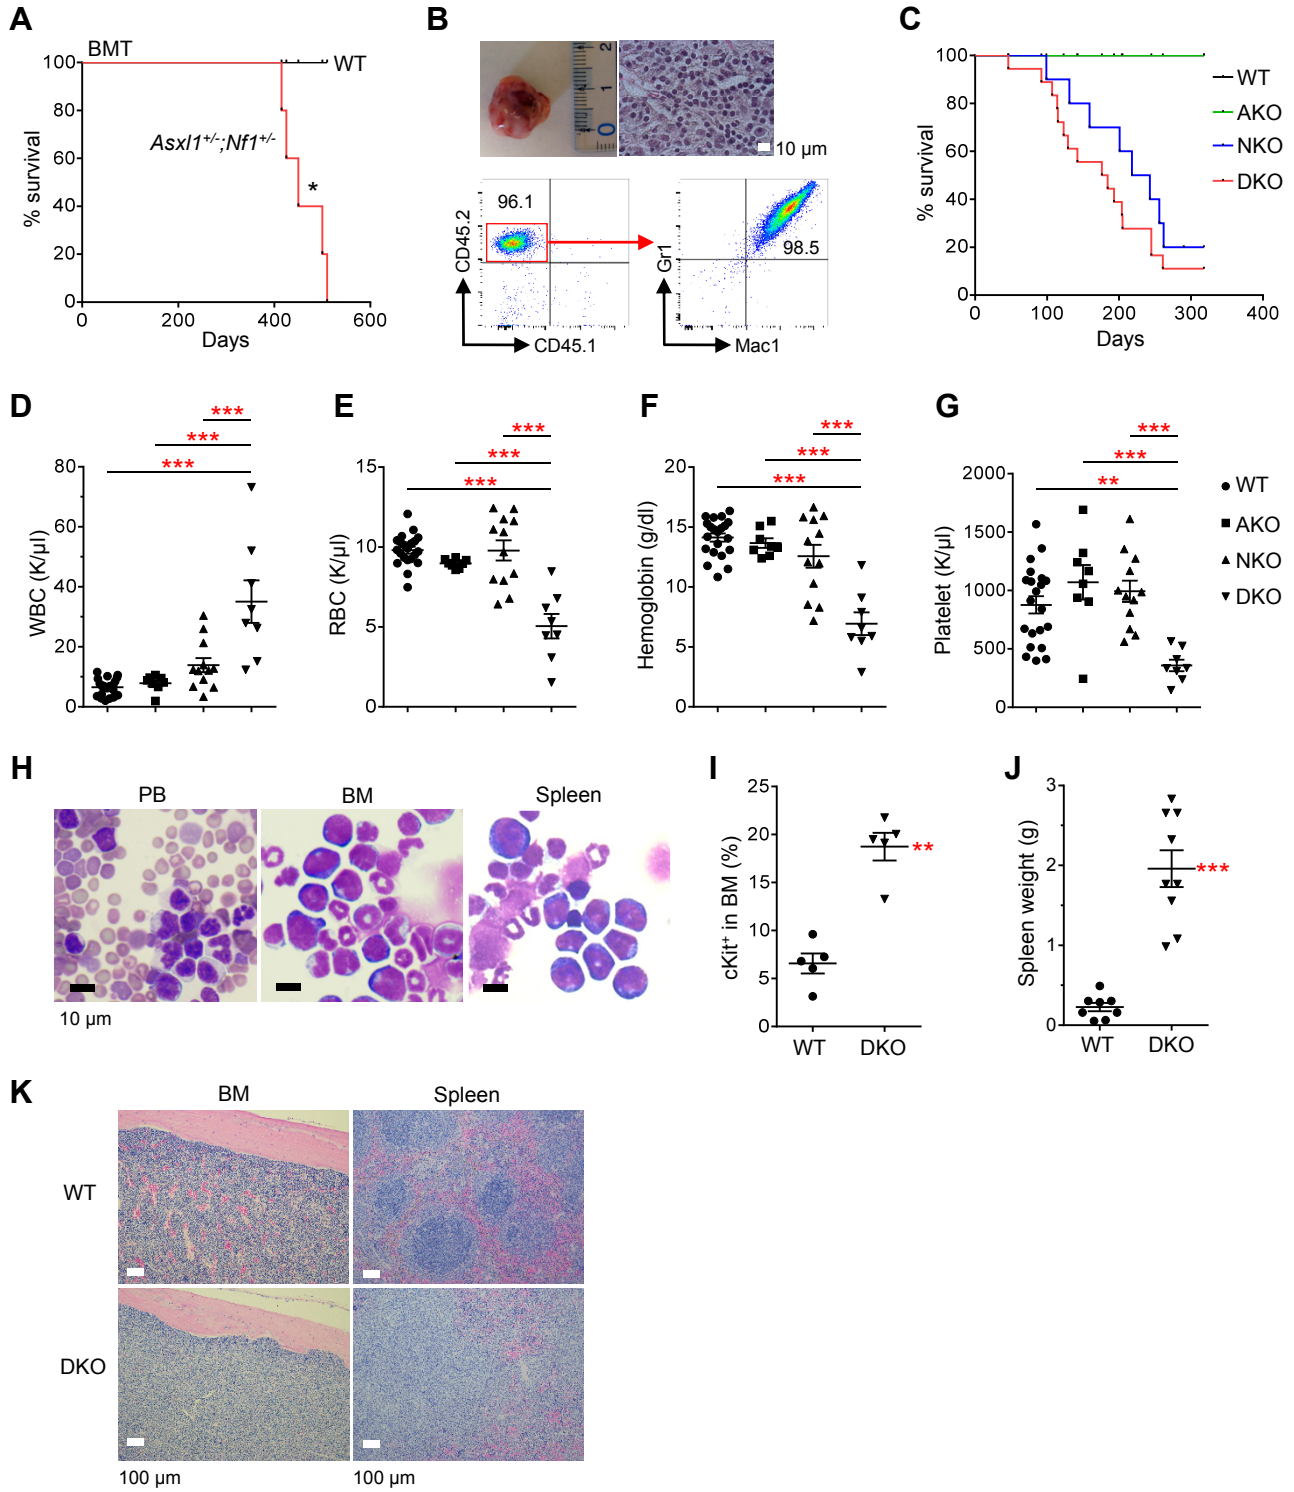

**Figure S2. Deletion of *Asx1* and *Nf1* accelerates the development of myeloid leukemia in vivo.** (A) Kaplan-Meier curve representing percent survival of recipient mice transplanted with BM cells from WT and young *Asx1*<sup>+/-</sup>;*Nf1*<sup>+/-</sup> mice (*n* = 5 per group). No lethality was observed for recipients of WT BM cells. A log-rank test was used for survival statistics. (B) The appearance of one *Asx1*<sup>+/-</sup>;*Nf1*<sup>+/-</sup> transplanted mouse (*n* = 5) with a large mass in the stomach (left panel). Representative microphotograph of H&E stained section of the mass (right panel). Below is the flow cytometric analysis of the cells within the large mass. (C) Kaplan-Meier survival curve showing the percent survival of WT (*n* = 10), *Asx1*<sup>Δ/Δ</sup> (AKO, *n* = 5), *Nf1*<sup>Δ/Δ</sup> (NKO, *n* = 10) and DKO (*n* = 18) mice over time. (D-G) Peripheral WBC count (D), RBC count (E), Hemoglobin (F), and Platelets (G) for each genotype of mice (*n* = 8 to 21 per group) at time of sacrifice (3-6 months after plpC injection). (H) May-Grunwald-Giemsa-stained blood smear and cytopsin preparations of BM and spleen cells from WT and DKO mice. Scale bar: 10 μm. (I) Flow cytometric analysis of the BM cells revealed a significantly increased cKit<sup>+</sup> population in DKO mice (*n* = 5 per group). (J) Spleen weight from WT and DKO mice is shown (*n* = 8 to 9 per group). (K) Representative H&E stained sections from femur and spleen from WT and DKO mice are shown. Scale bar: 100 μm. Data represent mean ± SEM. \**P* < 0.05; \*\**P* < 0.01; \*\*\**P* < 0.001; one-way ANOVA with Tukey's multiple comparisons test (D-G) or unpaired Student's *t*-test (I and J).

Figure S3

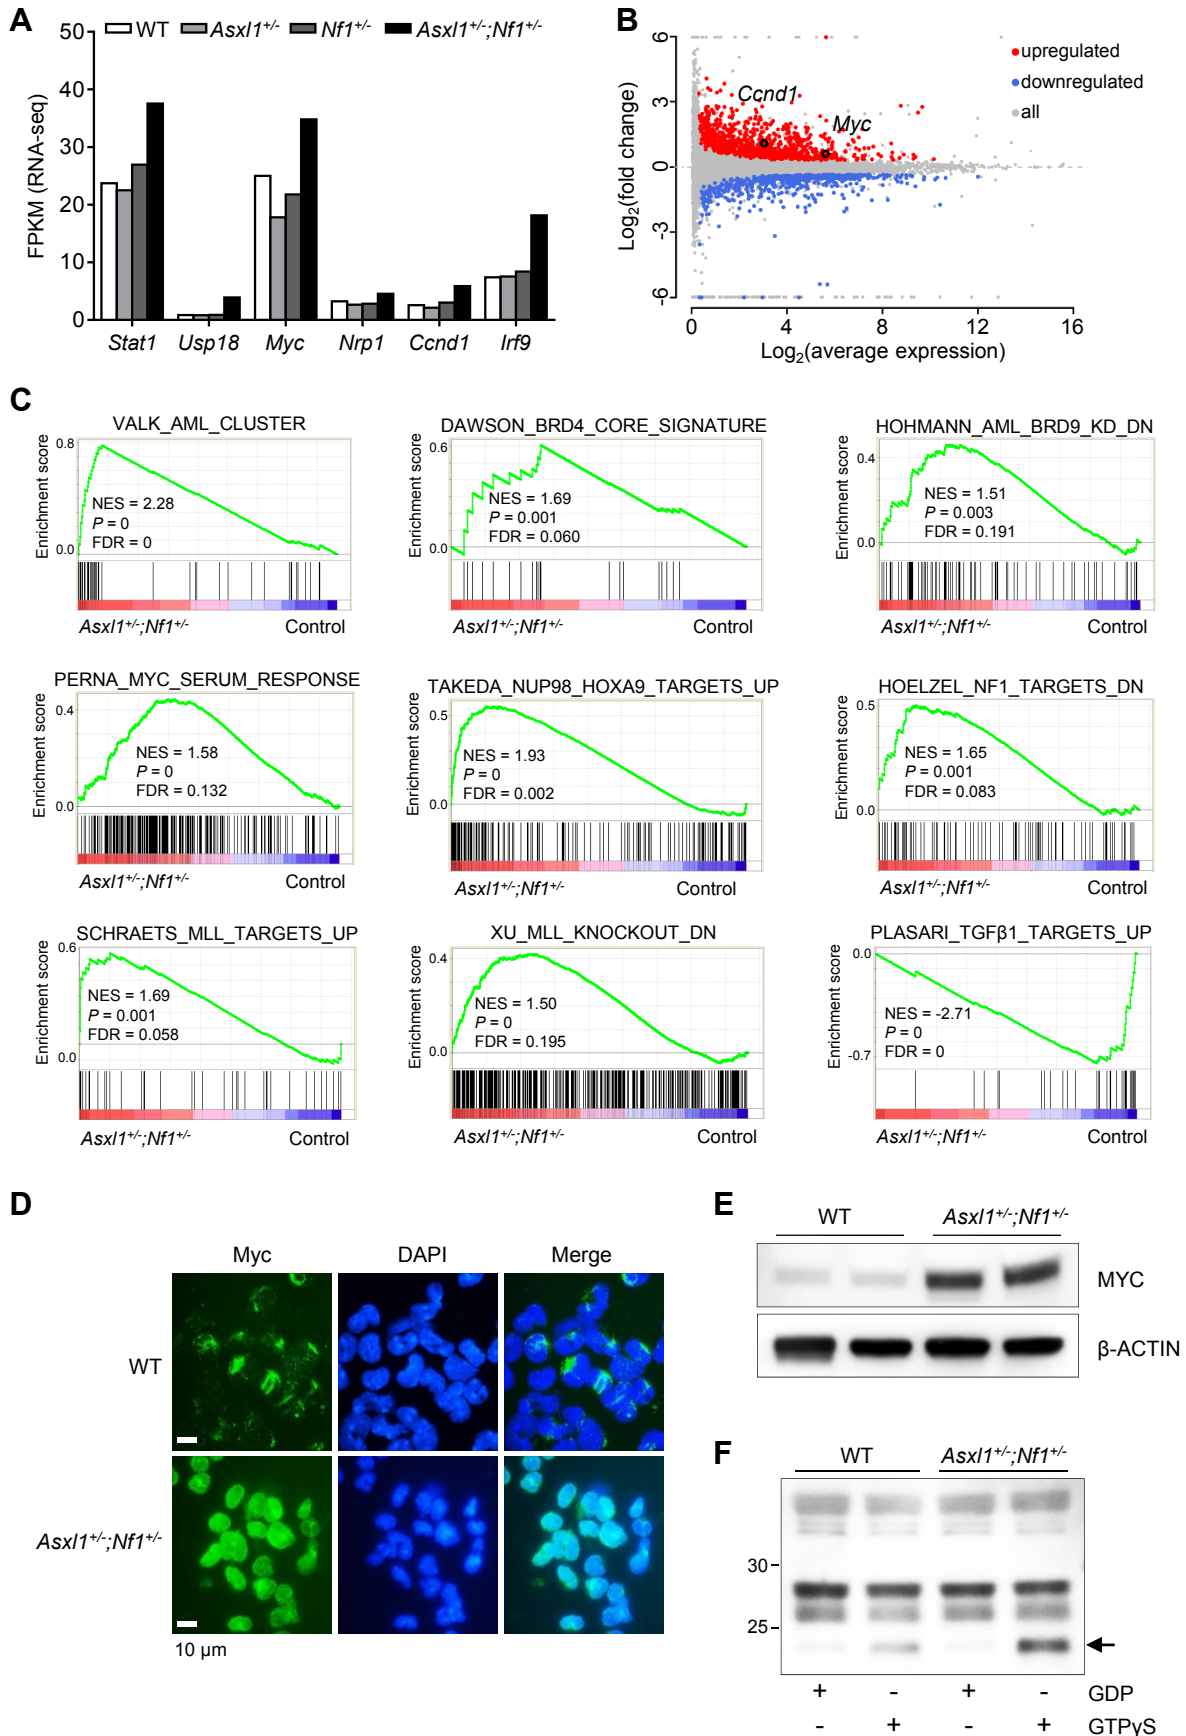

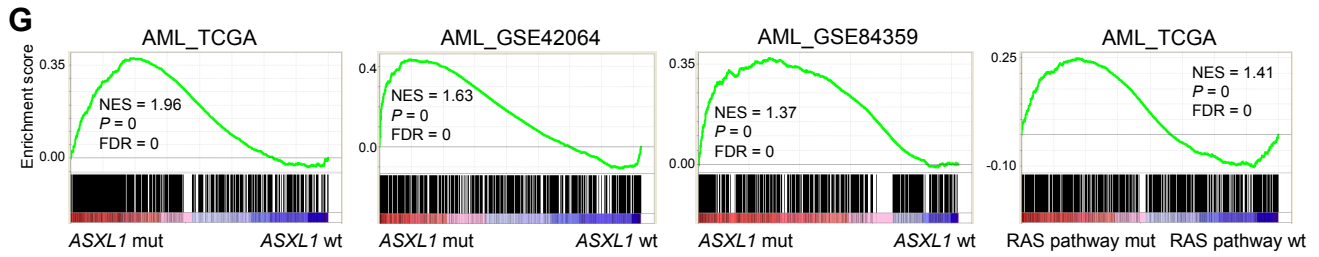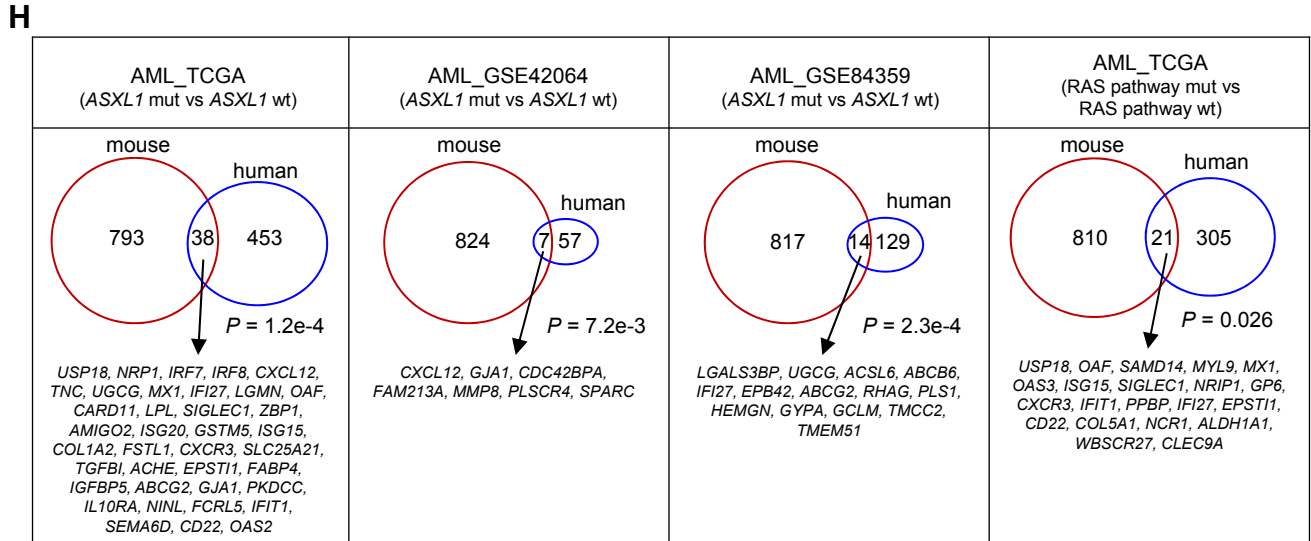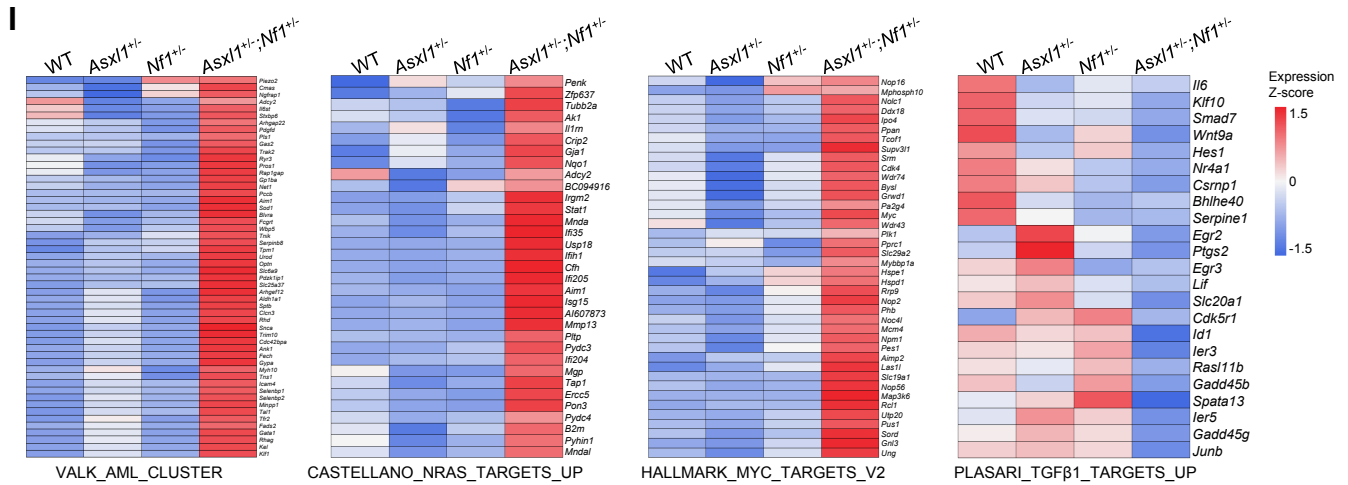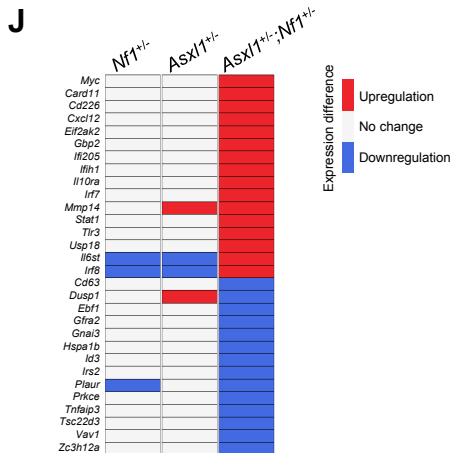

**Figure S3. Cooperative effect of *Asx1* and *Nf1* loss on the induction of a MYC-driven transcription signature.** (A) Fragments per kilobase of transcript per million (FPKM) values of DEGs in RNA-seq are shown. Data represent the mean of two biological replicates. (B) MA plot showing the dysregulated genes in *Asx1*<sup>+/-</sup>;*Nf1*<sup>+/-</sup> cKit<sup>+</sup> cells compared with WT and single mutant cells. *Myc* and *Ccnd1* are highlighted in black. (C) GSEA showing expression differences of representative transcription signatures associated with AML, MYC, and MYC upregulators BRD4/9, NUP98-HOXA9, NF1, MLL, and TGFβ target genes in *Asx1*<sup>+/-</sup>;*Nf1*<sup>+/-</sup> cKit<sup>+</sup> cells compared with control cells. (D) Immunofluorescence assay shows the MYC protein accumulation (Green) in *Asx1*<sup>+/-</sup>;*Nf1*<sup>+/-</sup> BMMNCs compared with WT cells. Nuclei were visualized with DAPI (Blue). Scale bars: 10 μm. (E) Western blot showing the MYC protein levels in *Asx1*<sup>+/-</sup>;*Nf1*<sup>+/-</sup> and WT BMMNCs. (F) Activated RAS protein (RAS-GTP) was quantified in *Asx1*<sup>+/-</sup>;*Nf1*<sup>+/-</sup> BMMNCs via immunoprecipitation with the RAS-binding domain of RAF (RAF-1 RBD) followed by immunoblot using anti-RAS antibody. (G) GSEA showing that genes upregulated in *Asx1*<sup>+/-</sup>;*Nf1*<sup>+/-</sup> cKit<sup>+</sup> cells are enriched in AML patients with *ASXL1* or RAS pathway gene mutations compared with patients without those mutations. (H) Overlap of genes aberrantly overexpressed in *ASXL1* or RAS-mutated AML patients and in *Asx1*<sup>+/-</sup>;*Nf1*<sup>+/-</sup> cKit<sup>+</sup> cells. *P* values were calculated by two-tailed Fisher's exact test with GeneOverlap. (I) Leading edge genes in representative signatures that were obtained from GSEA analyses display increased or decreased expression specific to *Asx1*<sup>+/-</sup>;*Nf1*<sup>+/-</sup> cKit<sup>+</sup> cells. (J) Heatmap displaying expression difference of master regulators predicted with DEGs of *Asx1*<sup>+/-</sup>;*Nf1*<sup>+/-</sup> in single mutant cells compared with WT.

Figure S4

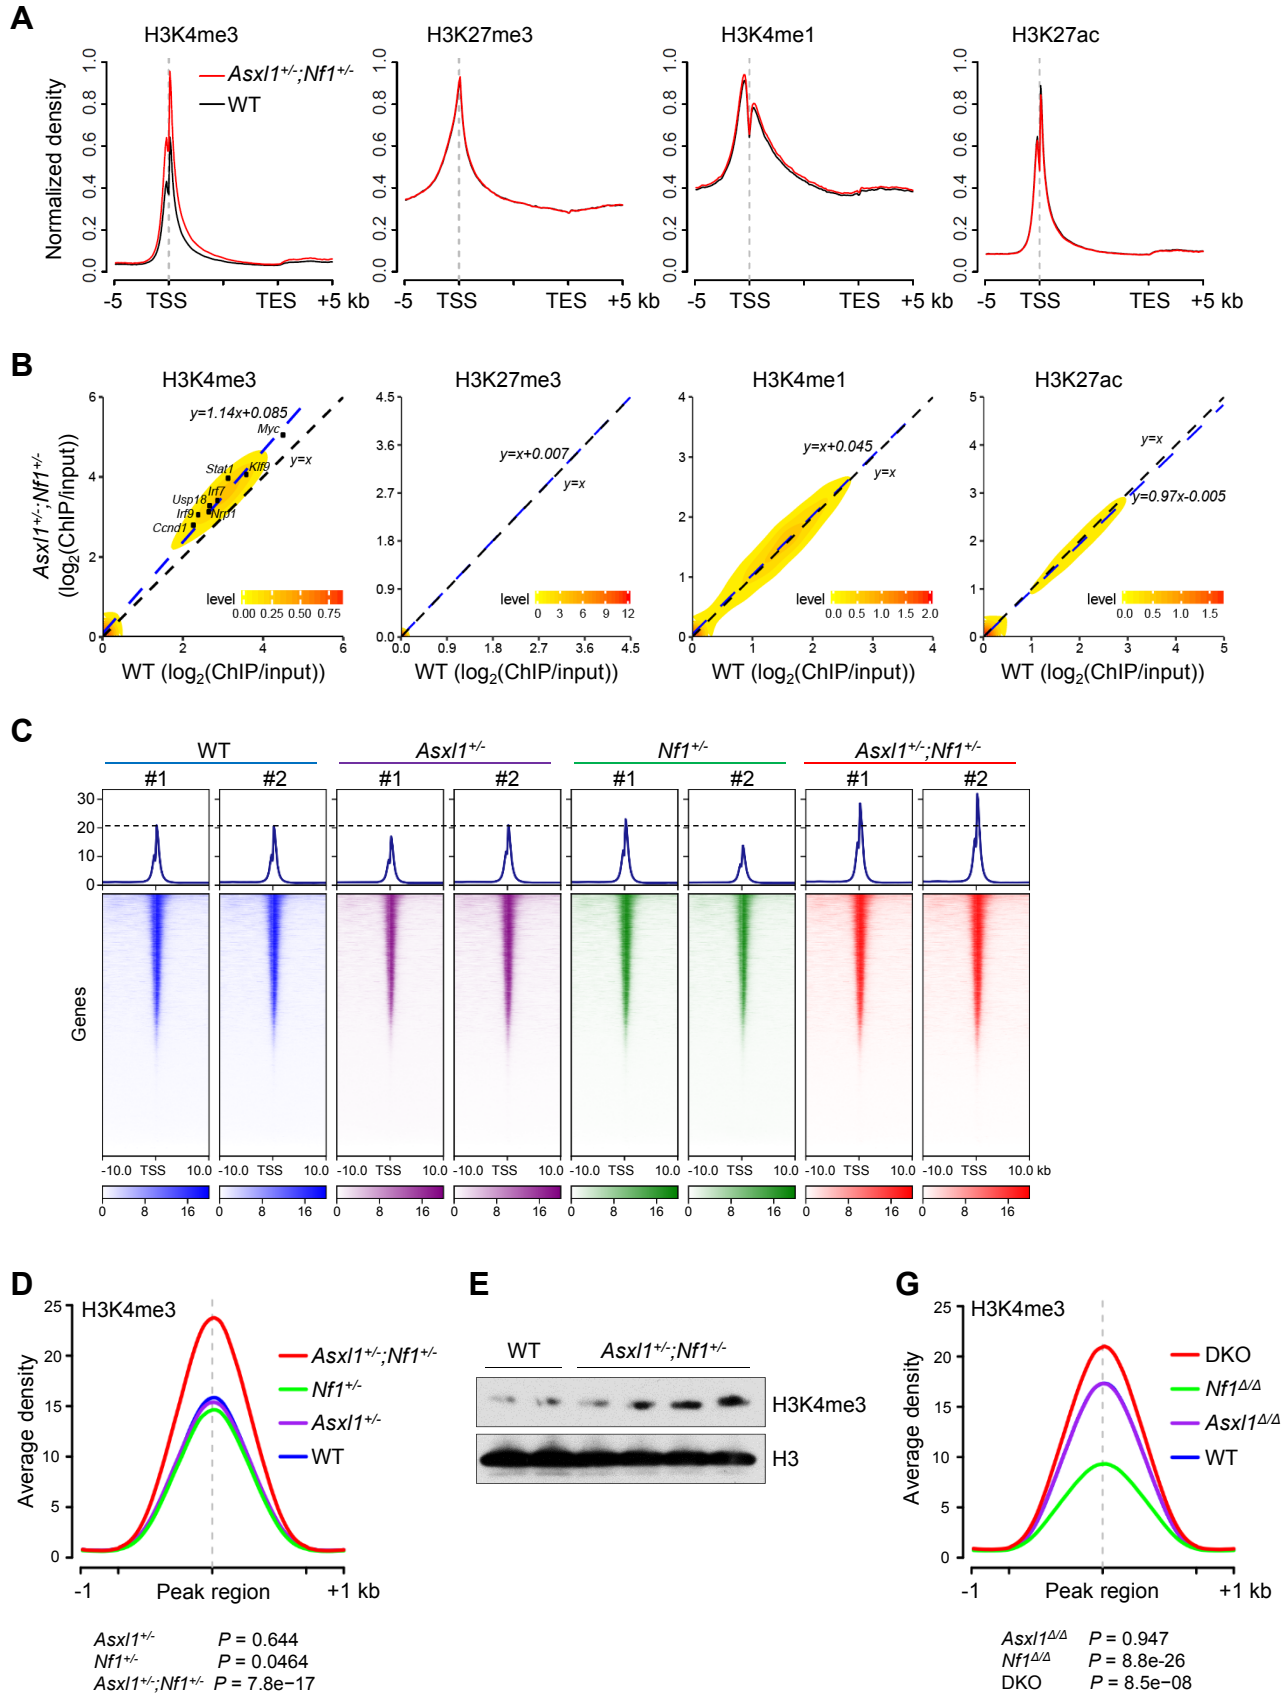





**Figure S4. Increased H3K4me3 enrichment contributes to aberrant activation of key signatures in *Asx1*<sup>+/-</sup>;*Nf1*<sup>+/-</sup> cKit<sup>+</sup> cells.** (A) Global levels of histone modifications at genes and flanking 5 kb regions. For ease of comparison, coverages normalized by sequencing depth were scaled to 100% and averaged in two biological replicates. (B) 2D Kernel Density plots showing relative enrichment intensity of histone modifications at each gene locus ranging from upstream 5 kb to downstream 5 kb of transcription start site (TSS ± 5kb). The x-axis and y-axis show log<sub>2</sub> transformed enrichment fold (ChIP/input) averaged in two biological replicates. Genes shown in Figure 3D are highlighted in black points. Dashed blue line: linear fit. Dashed black line: y = x. (C and F) Density plot displaying H3K4me3 occupancies centered on TSSs in each genotype of mice, respectively. Each row represents a single gene. (D and G) Global levels of H3K4me3 at enriched and flanking 1 kb regions. For ease of comparison, normalized coverages by sequencing depth were averaged in 2 or 3 biological replicates. Statistical analysis was performed using unpaired Student's *t*-test to determine H3K4me3 difference between WT and other genotypes. (E) Western blot analysis showing the global H3K4me3 levels in *Asx1*<sup>+/-</sup>;*Nf1*<sup>+/-</sup> and WT cKit<sup>+</sup> cells. H3 was used as a loading control. (H) GSEA plot showing an increase in H3K4me3 occupancies at TSS ± 5 kb for all 831 upregulated genes in *Asx1*<sup>+/-</sup>;*Nf1*<sup>+/-</sup> cKit<sup>+</sup> cells. NES, *P*, and FDR values are shown. (I) Normalized ChIP-binding signals are displayed for four histone modifications on the *Ccnd1* gene. The y-axis represents the normalized read density that was averaged in two biological replicates. The identified DER and its statistical difference between *Asx1*<sup>+/-</sup>;*Nf1*<sup>+/-</sup> versus WT cells are indicated in a blue box. (J) GSEA plots showing enrichment of the indicated signatures consisting of activated genes marked by promoter H3K4me3 occupancies in *Asx1*<sup>+/-</sup>;*Nf1*<sup>+/-</sup> versus WT cells. NES, *P*, and FDR values are shown. (K) ChIP-qPCR showing the enrichment of H3K27me3 on key gene promoters (*n* = 3 to 5 mice per group). Data represent mean ± SEM.

Figure S5

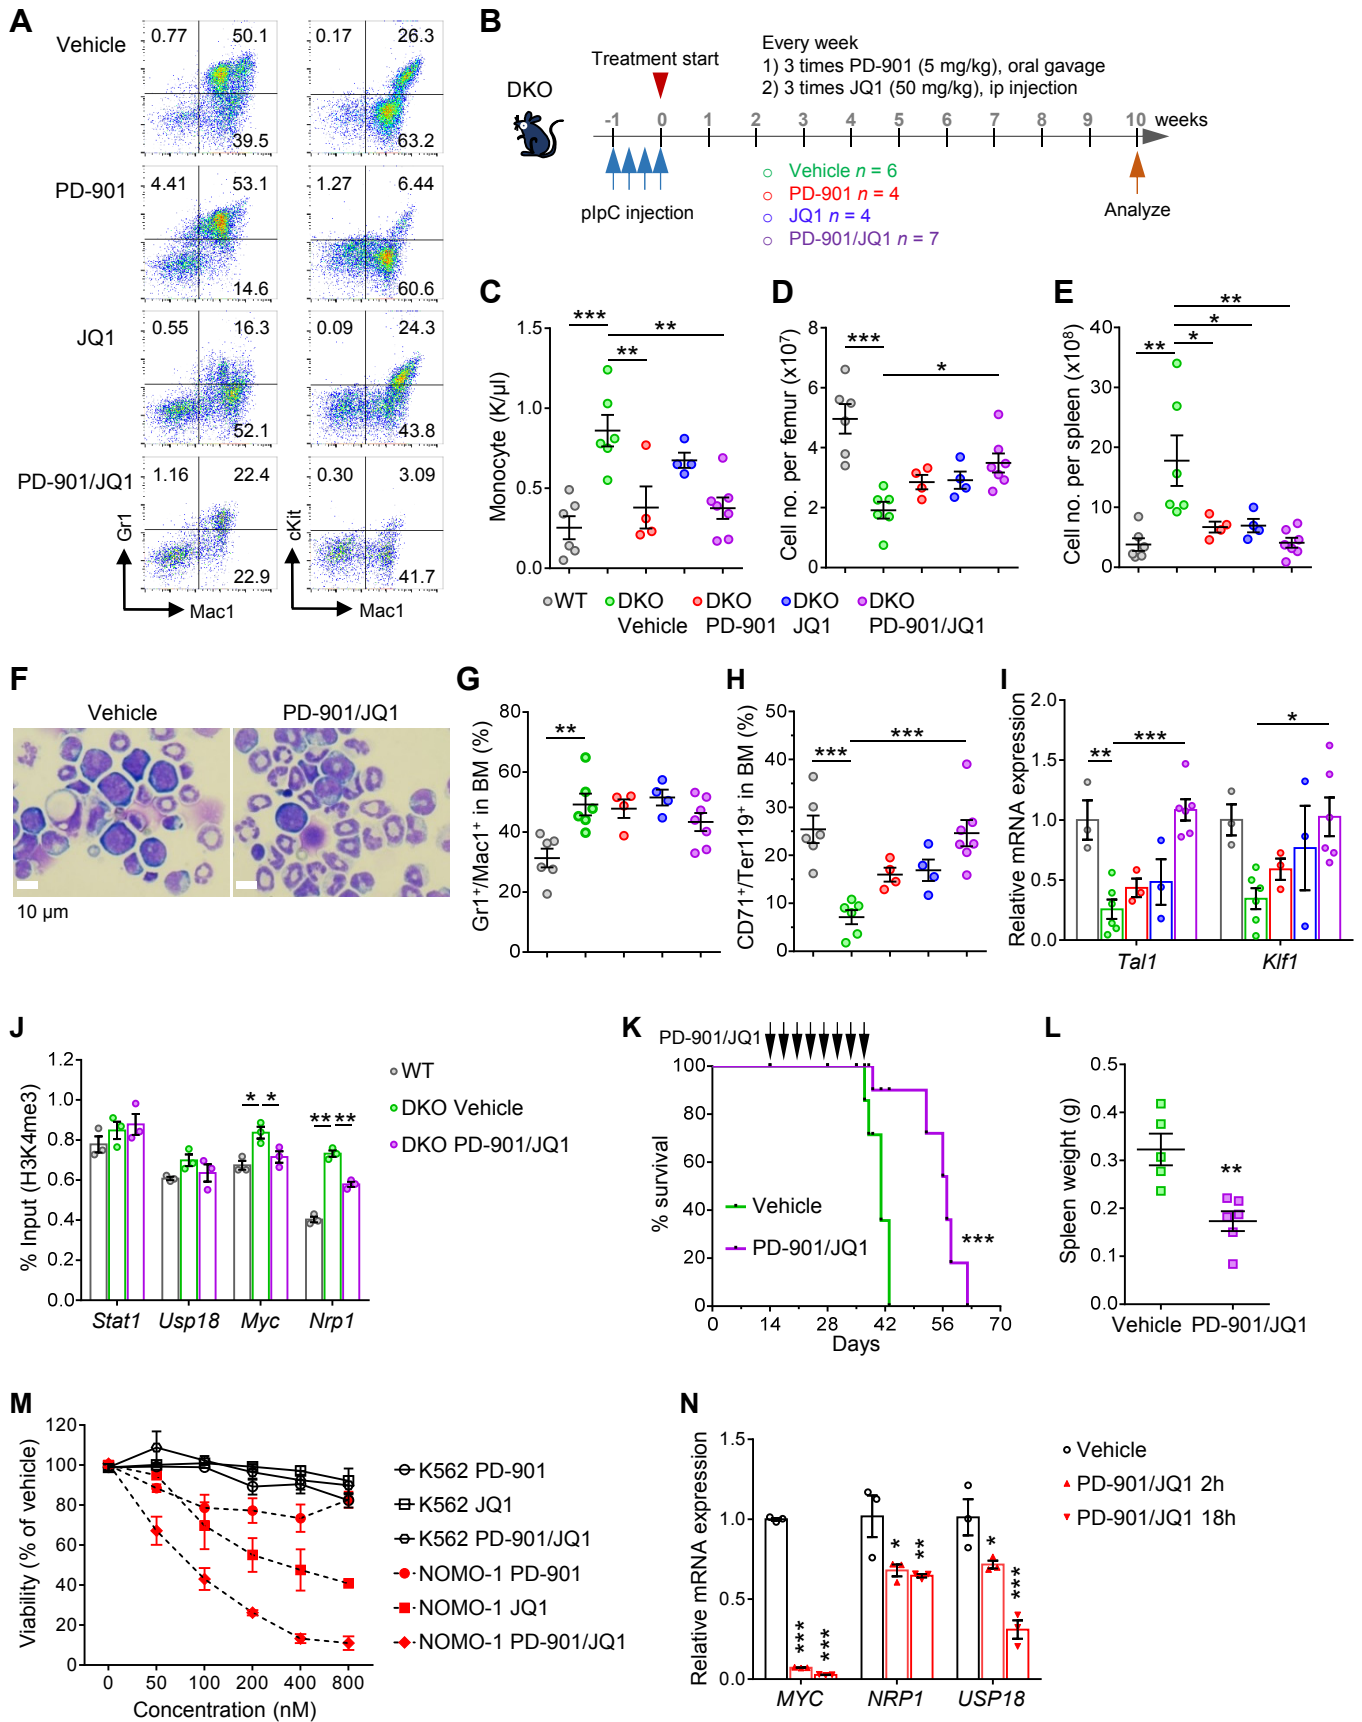

**Figure S5. Inhibition of the MAPK pathway and MYC using PD-901 and JQ1 eradicate leukemogenesis in vivo.** (A) Liquid cultures of DKO BM cells with PD-901, JQ1, or PD-901/JQ1 for 3 days. Flow cytometric analyses showing the percentage of Gr1<sup>+</sup>/Mac1<sup>+</sup> and cKit<sup>+</sup>/Mac1<sup>+</sup> cells ( $n = 3$  mice per group from 2 independent experiments). (B) Schema of PD-901 and JQ1 treatment in vivo ( $n = 4$  to 7 mice per group). (C) Peripheral monocyte count. (D) Bone marrow cellularity (femur) for each group of mice. (E) Spleen cell number. (F and G) Mature myeloid cells were observed in the PD-901 and/or JQ1 treated groups compared with the vehicle controls. (H and I) Erythroid differentiation was restored in the PD-901/JQ1 treated group. The frequency of CD71<sup>+</sup>/Ter119<sup>+</sup> cells were significantly increased (H) and the expression level of erythroid transcription factors *Tal1* and *Klf1* were significantly increased (I) in the PD-901/JQ1 treatment group ( $n = 3$  to 6 mice per group). (J) ChIP-qPCR shows the enrichment of H3K4me3 in the key DEGs ( $n = 3$  mice per group). (K) Survival curve of the *Asx1*<sup>+/-</sup>;*Nf1*<sup>+/-</sup> recipient mice treated with vehicle or combination of PD-901 and JQ1. The treatment began 14 days after *Asx1*<sup>+/-</sup>;*Nf1*<sup>+/-</sup> leukemic cell transplant ( $n = 5$  to 6 mice per group). A log-rank test was used for survival statistics. (L) Spleen weight was measured after 3 weeks of the treatment. (M) Dose-response of human AML cell lines to PD-901 and JQ1. Cells were treated with vehicle or indicated inhibitors for 3 days and viable cells were counted by flow cytometry. Cell numbers were normalized to vehicle treated controls. The graph shows an average of three independent experiments. (N) qPCR showing the expression levels of *MYC*, *NRP1* and *USP18* were significantly decreased after the treatment of PD-901/JQ1. Data represent mean  $\pm$  SEM. \* $P < 0.05$ ; \*\* $P < 0.01$ ; \*\*\* $P < 0.001$ ; one-way ANOVA with Tukey's multiple comparisons test (C-E and G-J) or unpaired Student's *t*-test (L and N).

**Table S1. Diagnosis of MDS, MPN and MDS/MPN developed in 12 *Asx1<sup>+/-</sup>;Nf1<sup>+/-</sup>* mice.**

| Survival (Months) | Blood counts | Blasts (%) | Dysplastic Neutrophil | Necropsy and other findings | Diagnosis and subclassification |
|-------------------|--------------|------------|-----------------------|-----------------------------|---------------------------------|
| 15-16<br>(n = 2)  | WBC ↓        | < 20%      | Yes                   | Splénomegaly                | MDS                             |
|                   | NE →▲        |            |                       |                             |                                 |
|                   | MO ↓         |            |                       |                             |                                 |
|                   | RBC →        |            |                       |                             |                                 |
|                   | PLT ↓        |            |                       |                             |                                 |
| 13<br>(n = 1)     | WBC ▲        | < 20%      | No                    | Splénomegaly                | MPN                             |
|                   | NE ▲         |            |                       |                             |                                 |
|                   | MO →         |            |                       |                             |                                 |
|                   | RBC ▲        |            |                       |                             |                                 |
|                   | PLT →        |            |                       |                             |                                 |
| 8-16<br>(n = 6)   | WBC →↓       | < 20%      | Yes                   | splénomegaly                | MDS/MPN                         |
|                   | NE →▲        |            |                       |                             |                                 |
|                   | MO →         |            |                       |                             |                                 |
|                   | RBC →↓       |            |                       |                             |                                 |
|                   | PLT →↓       |            |                       |                             |                                 |

**Table S2. Diagnosis of myeloid leukemia developed in 12 *Asx1<sup>+/-</sup>;Nf1<sup>+/-</sup>* mice.**

| Survival (days) | Blood counts | Blasts (%) | Necropsy and other findings | Diagnosis and subclassification     |
|-----------------|--------------|------------|-----------------------------|-------------------------------------|
| 395             | WBC ▲        | > 20%      | Splénomegaly                | Myeloid leukemia                    |
|                 | NE ▲         |            |                             |                                     |
|                 | MO →         |            |                             |                                     |
|                 | RBC →        |            |                             |                                     |
|                 | PLT →        |            |                             |                                     |
| 425             | WBC ▲        | > 20%      | Splénomegaly                | Myeloid leukemia (tumor in stomach) |
|                 | NE ▲         |            |                             |                                     |
|                 | MO →         |            |                             |                                     |
|                 | RBC →        |            |                             |                                     |
|                 | PLT →        |            |                             |                                     |
| 510             | WBC ▲        | > 20%      | Hepato-splénomegaly         | Myeloid leukemia (tumor in liver)   |
|                 | NE ▲         |            |                             |                                     |
|                 | MO →         |            |                             |                                     |
|                 | RBC ↓        |            |                             |                                     |
|                 | PLT ↓        |            |                             |                                     |

**Table S3. Somatic single nucleotide variants and indels identified in 2 *Asx1<sup>+/-</sup>;Nf1<sup>+/-</sup>* leukemias through whole exome sequencing. (Excel file)**

**Table S4. Differentially expressed genes from RNA-seq. (Excel file)**

**Table S5. Gene panel for targeted sequencing used in this study.**

|               |               |              |               |                |               |                |
|---------------|---------------|--------------|---------------|----------------|---------------|----------------|
| <i>ABL1</i>   | <i>CREBBP</i> | <i>FGFR3</i> | <i>JAK3</i>   | <i>NOTCH2</i>  | <i>SETBP1</i> | <i>TET2</i>    |
| <i>ASXL1</i>  | <i>CSF3R</i>  | <i>FLT3</i>  | <i>KIT</i>    | <i>NPM1</i>    | <i>SF1</i>    | <i>TNFAIP3</i> |
| <i>ATM</i>    | <i>CUX1</i>   | <i>GATA1</i> | <i>KMT2D</i>  | <i>NRAS</i>    | <i>SF3A1</i>  | <i>TP53</i>    |
| <i>BCOR</i>   | <i>DNMT3A</i> | <i>GATA2</i> | <i>KRAS</i>   | <i>PAX5</i>    | <i>SF3B1</i>  | <i>U2AF1</i>   |
| <i>BCORL1</i> | <i>DNMT3B</i> | <i>GATA3</i> | <i>MLL</i>    | <i>PHF6</i>    | <i>SH2B3</i>  | <i>U2AF2</i>   |
| <i>BRAF</i>   | <i>EED</i>    | <i>IDH1</i>  | <i>MPL</i>    | <i>PRPF40B</i> | <i>SMC1A</i>  | <i>WT1</i>     |
| <i>CALR</i>   | <i>EP300</i>  | <i>IDH2</i>  | <i>MYC</i>    | <i>PTEN</i>    | <i>SMC3</i>   | <i>ZRSR2</i>   |
| <i>CBL</i>    | <i>ETV6</i>   | <i>IKZF1</i> | <i>MYD88</i>  | <i>PTPN11</i>  | <i>SRSF2</i>  |                |
| <i>CCND3</i>  | <i>EZH2</i>   | <i>JAK1</i>  | <i>NF1</i>    | <i>RB1</i>     | <i>SUZ12</i>  |                |
| <i>CEBPA</i>  | <i>FBXW7</i>  | <i>JAK2</i>  | <i>NOTCH1</i> | <i>RUNX1</i>   | <i>TAL1</i>   |                |

**Table S6. RAS pathway gene mutations identified in 138 cases with myeloid malignancies. (Excel file)**

**Table S7. Comparison of clinical characteristics by RAS pathway gene mutation status in myeloid malignancies.**

| Characteristic                       | RAS pathway gene                    |                                                     | <i>P</i> |
|--------------------------------------|-------------------------------------|-----------------------------------------------------|----------|
|                                      | mutated ( <i>n</i> = 35)<br>no. (%) | RAS pathway gene wt<br>( <i>n</i> = 103)<br>no. (%) |          |
| Age, years                           |                                     |                                                     | 0.432    |
| Median                               | 43                                  | 47                                                  |          |
| Range                                | 22-73                               | 25-68                                               |          |
| Sex                                  |                                     |                                                     | 0.427    |
| Male                                 | 20 (57%)                            | 55 (53%)                                            |          |
| Female                               | 15 (43%)                            | 48 (47%)                                            |          |
| Diagnosis                            |                                     |                                                     | 0.033    |
| AML                                  | 17 (48.6)                           | 30 (29.1)                                           | 0.041    |
| MDS                                  | 7 (20)                              | 45 (43.7)                                           | 0.015    |
| MPN                                  | 3 (8.6)                             | 26 (25.2)                                           | 0.027    |
| MDS/MPN                              | 8 (22.9)                            | 2 (1.9)                                             | <0.001   |
| Bone marrow blasts (%)               |                                     |                                                     | 0.027    |
| Median                               | 15.5                                | 2                                                   |          |
| Range                                | 0-93.5                              | 0-92.5                                              |          |
| WBC count (x10 <sup>9</sup> /L)      |                                     |                                                     | 0.084    |
| Median                               | 45.46                               | 4.68                                                |          |
| Range                                | 1.59-182.83                         | 0.13-258                                            |          |
| Hemoglobin (g/L)                     |                                     |                                                     | 0.020    |
| Median                               | 81                                  | 96                                                  |          |
| Range                                | 33-152                              | 18-195                                              |          |
| Platelet count (x10 <sup>9</sup> /L) |                                     |                                                     | 0.001    |
| Median                               | 51                                  | 75                                                  |          |
| Range                                | 8-695                               | 3-3149                                              |          |

**Table S8. Revised International Prognostic Scoring System risk category for MDS patients with *ASXL1* and/or RAS pathway gene mutations.**

| MDS patients     | Very Low   | Low          | Intermediate | High        | Very High  |
|------------------|------------|--------------|--------------|-------------|------------|
| RAS gene mutated | 14.3 (1/7) | 14.3 (1/7)   | 14.3 (1/7)   | 14.3 (1/7)  | 28.6 (2/7) |
| RAS gene WT      | 0.0 (0/45) | 44.3 (20/45) | 28.9 (13/45) | 20.0 (9/45) | 6.7 (3/45) |

**Table S9. Flow antibodies used in this study.**

| Antibody name                   | Clone   | Color       | Catalog | Company       |
|---------------------------------|---------|-------------|---------|---------------|
| Rat anti-Mouse CD34             | RAM34   | FITC        | 553733  | BD Pharmingen |
| Rat anti-Mouse Ly-6A/E (Sca1)   | D7      | PE-Cy7      | 558162  | BD Pharmingen |
| Rat anti-Mouse CD117            | 2B8     | PE          | 553355  | BD Pharmingen |
| Rat anti-Mouse CD117            | 2B8     | APC         | 553356  | BD Pharmingen |
| Rat anti-Mouse CD117            | 2B8     | PerCP-Cy5.5 | 560557  | BD Pharmingen |
| Rat anti-Mouse CD16/CD32        | 2.4G2   | APC-Cy7     | 560541  | BD Pharmingen |
| Rat anti-mouse CD135            | A2F10.1 | BV421       | 562898  | BD Horizon    |
| Mouse Lineage Antibody Cocktail |         | APC         | 558074  | BD Pharmingen |
| Rat anti-Mouse CD71             | C2      | FITC        | 553266  | BD Pharmingen |
| Rat anti-Mouse TER-119          | TER-119 | APC         | 557909  | BD Pharmingen |
| Rat anti-Mouse Ly-6G and Ly-6C  | RB6-8c5 | PerCP-Cy5.5 | 552093  | BD Pharmingen |
| Rat anti-Mouse CD11b            | M1/70   | PE          | 553311  | BD Pharmingen |
| Mouse anti-Mouse CD45.2         | 104     | PerCP-Cy5.5 | 552950  | BD Pharmingen |
| Mouse anti-Mouse CD45.1         | A20     | FITC        | 553775  | BD Pharmingen |
| 7-AAD                           |         | PerCP-Cy5.5 | 559925  | BD Pharmingen |



**Table S10. Primers used for in this study.**

| Gene Name    | Forward               | Reverse                |
|--------------|-----------------------|------------------------|
| qPCR-mouse   |                       |                        |
| <i>Asx1</i>  | TCACACCGAAAAGCCACAG   | GGGCATATCTGGTAAGTGGG   |
| <i>Nf1</i>   | CTTGAGGAGAACCAGAGGAAC | CAGTAGGGAGTGGCAAGTTG   |
| <i>Myc</i>   | AGAGCTCCTCGAGCTGTTTG  | TGAAGTTCACGTTGAGGGG    |
| <i>Nrp1</i>  | CCGGAACCCTACCAGAGAA   | CCCCATCAATTACTTCCACG   |
| <i>Stat1</i> | TCCCGTACAGATGTCCATGAT | CTGAATATTTCCCTCCTGGG   |
| <i>Usp18</i> | CTGCAGAAATACAACGTGCC  | GTGTCCGTGATCTGGTCCTT   |
| <i>Ccnd1</i> | TCCTCTCCAAAATGCCAGAG  | GGGTGGGTTGGAAATGAAC    |
| <i>Irf7</i>  | TGATCCGCATAAGGTGTACG  | AGCATTGCTGAGGCTCACTT   |
| <i>Irf9</i>  | TGAGCTAGAGGAGGGAGCTG  | ACTCGGCCACCATAGATGAA   |
| <i>Klf9</i>  | CCTCCCATCTTAAAGCCCAT  | AGCGCGAGAACTTTTTAAGG   |
| <i>Actb</i>  | GGCTGTATTCCCCTCCATCG  | CCAGTTGGTAACAATGCCATGT |
| <i>Tal1</i>  | CCCCATGTTACCAACAAC    | CCGCACTACTTTGGTGTGAG   |
| <i>Klf1</i>  | CTTTGGCACCTAAGAGGCAG  | CAGGAGCAGGCATAAGGC     |
| qPCR-human   |                       |                        |
| <i>MYC</i>   | TTTCGGGTAGTGGAAAACCA  | CACCGAGTCGTAGTCGAGGT   |
| <i>NRP1</i>  | GAAAAATGCGAATGGCTGAT  | TTGCAGTCTCTGTCTCCAA    |
| <i>USP18</i> | AGTCCCGACGTGGAACCTCAG | CAGCACGACTTCACTTCCAG   |
| <i>ACTB</i>  | GCACAGAGCCTCGCCTT     | CCTTGACATGCCGGAG       |
| ChIP-qPCR    |                       |                        |
| <i>Myc</i>   | GATCTGAGTCGGGGTAGAGC  | AACCCCGCTTCAAAATGCAT   |
| <i>Nrp1</i>  | TCTCGCGAATTCAGGCATTG  | CCGAAACGCTCTTAAGTCCG   |
| <i>Stat1</i> | GCCGTTCTCACTTCTAGGGT  | AAGGCGAGCAAAGGTTAAGC   |
| <i>Usp18</i> | TCGCAGAGCTGTACCTTCAT  | CTCTGACCAGTCCCACCATT   |
| <i>Ccnd1</i> | GCATGTTTCGTGGCCTCTAAG | AAAGAGGGATTGTCCGGTGGT  |
| <i>Irf7</i>  | AGGGTTCGGGTGTAGTTTGAG | AAACAGTCTAAACAGCGCCC   |
| <i>Irf9</i>  | CTGCCATTTCTTCAGCTCC   | AAGGCATCTATCTCCCCAGC   |
| <i>Klf9</i>  | GAGTTGAATCACCCCTCCCCA | CGGCATTCTCCAGCTCAGTA   |
